# Supplementary material for: Direct organocatalytic synthesis of enantiopure succinimides from β-lactam aldehydes through ring expansion promoted by azolium salt precatalysts
Source: Royal Society of Chemistry journal article supplement (doi:10.1039/b711473g), 2007-01-01
Supplement: b711473g.pdf [file b711473g.pdf]

## Supporting Information for the Paper

### Direct Organocatalytic Synthesis of Enantiopure Succinimides from $\beta$ -Lactam Aldehydes through Ring Expansion Promoted by Azolium Salt Precatalysts

Benito Alcaide,<sup>\*a</sup> Pedro Almendros,<sup>\*b</sup> Gema Cabrero,<sup>a</sup> and M. Pilar Ruiz<sup>a</sup>

<sup>a</sup>*Departamento de Química Orgánica I. Facultad de Química. Universidad Complutense 28040-Madrid. Spain*

<sup>b</sup>*Instituto de Química Orgánica General, CSIC, Juan de la Cierva 3, 28006-Madrid, Spain*

E-mail: alcaideb@quim.ucm.es; iqoa392@iqog.csic.es

**General methods:** <sup>1</sup>H NMR and <sup>13</sup>C NMR spectra were recorded on a Bruker Avance-300, Varian VRX-300S or Bruker AC-200. NMR spectra were recorded in CDCl<sub>3</sub> solutions, except otherwise stated. Chemical shifts are given in ppm relative to TMS (<sup>1</sup>H, 0.0 ppm), or CDCl<sub>3</sub> (<sup>13</sup>C, 76.9 ppm). Low and high resolution mass spectra were taken on a HP5989A spectrometer using the electronic impact (EI) or electrospray modes (ES) unless otherwise stated. Specific rotation [ $\alpha$ ]<sub>D</sub> is given in 10<sup>-1</sup> deg cm<sup>2</sup> g<sup>-1</sup> at 20 °C, and the concentration (*c*) is expressed in g per 100 mL. All commercially available compounds were used without further purification.

**Succinimide (+)-4a.** From 100 mg (0.426 mmol) of aldehyde (+)-**1a**, and after chromatography of the residue using hexanes/ethyl acetate (3:1) as eluent, 88 mg (88%) of compound (+)-**4a** were obtained as a colorless solid; mp = 100–102 °C (hexanes/ethyl acetate); [ $\alpha$ ]<sub>D</sub> = +48.6 (*c* 1.0, CHCl<sub>3</sub>); <sup>1</sup>H NMR (200 MHz, CDCl<sub>3</sub>)  $\delta$  7.21 (m, 2H), 6.99 (m, 2H), 4.36 (dd, *J* = 8.2, 4.1 Hz, 1H), 3.83 (s, 3H), 3.68 (s, 3H), 3.18 (dd, *J* = 18.2, 8.2 Hz, 1H), 2.80 (dd, *J* = 18.3, 4.2 Hz, 1H); <sup>13</sup>C NMR (75 MHz, CDCl<sub>3</sub>)  $\delta$  174.7, 173.4, 159.6, 127.5, 123.8, 114.5, 74.7, 59.0, 55.4,

36.0; IR (KBr,  $\text{cm}^{-1}$ )  $\nu$  1719; MS (EI),  $m/z$  235 ( $\text{M}^+$ , 49), 149 (100). Anal. Calcd. for  $\text{C}_{12}\text{H}_{13}\text{NO}_4$ : C, 61.27; H, 5.57; N, 5.95. Found: C, 61.39; H, 5.50; N, 5.99.

**Succinimide (+)-4b.** From 100 mg (0.323 mmol) of aldehyde (+)-**1b**, and after chromatography of the residue using hexanes/ethyl acetate (3:1) as eluent, 62 mg (62%) of compound (+)-**4b** were obtained as a colorless solid; mp = 108–110 °C (hexanes/ethyl acetate);  $[\alpha]_{\text{D}} = +50.0$  ( $c$  0.7,  $\text{CHCl}_3$ );  $^1\text{H}$  NMR (200 MHz,  $\text{CDCl}_3$ )  $\delta$  7.39 (m, 5H), 7.21 (m, 2H), 6.99 (m, 2H), 5.07 and 4.85 (d,  $J = 11.6$  Hz, each 1H), 4.52 (dd,  $J = 8.3, 4.3$  Hz, 1H), 3.83 (s, 3H), 3.13 (dd,  $J = 18.3, 8.3$  Hz, 1H), 2.84 (dd,  $J = 18.3, 4.3$  Hz, 1H);  $^{13}\text{C}$  NMR (50 MHz,  $\text{CDCl}_3$ )  $\delta$  175.1, 173.4, 159.6, 136.6, 128.6, 128.3, 128.3, 127.6, 123.9, 114.5, 73.1, 72.1, 55.5, 36.4; IR (KBr,  $\text{cm}^{-1}$ )  $\nu$  1716; MS (EI),  $m/z$  311 ( $\text{M}^+$ , 5), 205 (100). Anal. Calcd. for  $\text{C}_{18}\text{H}_{17}\text{NO}_4$ : C, 69.44; H, 5.50; N, 4.50. Found: C, 69.31; H, 5.44; N, 4.53.

**Succinimide (+)-4c.** From 100 mg (0.286 mmol) of aldehyde (+)-**1c**, and after chromatography of the residue using hexanes/ethyl acetate (2:1) as eluent, 87 mg (87%) of compound (+)-**4c** were obtained as a colorless solid; mp = 179–180 °C (hexanes/ethyl acetate);  $[\alpha]_{\text{D}} = +8.1$  ( $c$  0.8,  $\text{CHCl}_3$ );  $^1\text{H}$  NMR (200 MHz,  $\text{CDCl}_3$ )  $\delta$  7.91 (m, 2H), 7.80 (m, 2H), 7.30 (m, 2H), 7.02 (m, 2H), 5.38 (dd,  $J = 9.6, 6.0$  Hz, 1H), 3.85 (s, 3H), 3.34 (dd,  $J = 18.1, 9.8$  Hz, 1H), 3.10 (dd,  $J = 18.1, 6.0$  Hz, 1H);  $^{13}\text{C}$  NMR (50 MHz,  $\text{CDCl}_3$ )  $\delta$  173.0, 172.6, 166.9, 159.8, 134.6, 131.6, 127.8, 124.2, 123.9, 114.6, 55.5, 46.9, 34.2; IR (KBr,  $\text{cm}^{-1}$ )  $\nu$  1703; MS (EI),  $m/z$  350 ( $\text{M}^+$ , 100). Anal. Calcd. for  $\text{C}_{19}\text{H}_{14}\text{N}_2\text{O}_5$ : C, 65.14; H, 4.03; N, 8.00. Found: C, 65.28; H, 4.07; N, 8.06.

**Succinimide (+)-4d.** From 100 mg (0.426 mmol) of aldehyde (+)-**1d**, and after chromatography of the residue using hexanes/ethyl acetate (3:1) as eluent, 78 mg (78%) of compound (+)-**4d** were obtained as a colorless solid; mp = 98–100 °C (hexanes/ethyl acetate);  $[\alpha]_{\text{D}} = +48.5$  ( $c$  0.5,  $\text{CHCl}_3$ );  $^1\text{H}$  NMR (200 MHz,  $\text{CDCl}_3$ )  $\delta$  7.29 (m, 2H), 7.17 (m, 2H), 4.36 (dd,  $J = 8.2, 4.3$  Hz, 1H), 3.68 (s, 3H), 3.18 (dd,  $J = 18.2, 8.2$  Hz, 1H), 2.80 (dd,  $J = 18.3, 4.4$  Hz, 1H), 2.39 (s, 3H);  $^{13}\text{C}$  NMR (50 MHz,  $\text{CDCl}_3$ )  $\delta$  174.6, 173.2, 138.9, 128.6, 129.8, 126.1, 74.8, 59.0, 36.1, 21.2; IR (KBr,  $\text{cm}^{-1}$ )  $\nu$  1715; MS (EI),  $m/z$  219 ( $\text{M}^+$ , 41), 133 (100). Anal. Calcd. for  $\text{C}_{12}\text{H}_{13}\text{NO}_3$ : C, 65.74; H, 5.98; N, 6.39. Found: C, 65.61; H, 6.03; N, 6.34.

**Succinimide (+)-4e.** From 100 mg (0.418 mmol) of aldehyde (+)-**1e**, and after chromatography of the residue using hexanes/ethyl acetate (3:1) as eluent, 76 mg (76%) of

compound (+)-**4e** were obtained as a colorless solid; mp = 119–120 °C (hexanes/ethyl acetate);  $[\alpha]_D = +40.0$  (*c* 0.8, CHCl<sub>3</sub>); <sup>1</sup>H NMR (200 MHz, CDCl<sub>3</sub>) δ 7.45 (m, 2H), 7.26 (m, 2H), 4.36 (dd, *J* = 8.2, 4.3 Hz, 1H), 3.68 (s, 3H), 3.19 (dd, *J* = 18.3, 8.3 Hz, 1H), 2.81 (dd, *J* = 18.3, 4.3 Hz, 1H); <sup>13</sup>C NMR (50 MHz, CDCl<sub>3</sub>) δ 174.2, 172.8, 134.6, 129.8, 129.4, 127.5, 74.7, 59.1, 36.1; IR (KBr, cm<sup>-1</sup>) ν 1707; MS (EI), *m/z* 241 (M<sup>+</sup>, 32), 239 (M<sup>+</sup>, 100). Anal. Calcd. for C<sub>11</sub>H<sub>10</sub>ClNO<sub>3</sub>: C, 55.13; H, 4.21; N, 5.84. Found: C, 55.25; H, 4.37; N, 5.80.

**Preparation of Succinimide (+)-4f and Maleimide 5.** From 88 mg (0.29 mmol) of aldehyde (+)-**1f**, and after chromatography of the residue using hexanes/ethyl acetate (5:1) as eluent, 16 mg (20%) of the less polar compound **5** and 43 mg (49%) of the more polar compound (+)-**4f** were obtained.

**Succinimide (+)-4f.** Colorless solid; mp = 86–87 °C (hexanes/ethyl acetate);  $[\alpha]_D = +55.1$  (*c* 0.5, CHCl<sub>3</sub>); <sup>1</sup>H NMR (200 MHz, CDCl<sub>3</sub>) δ 7.17 (m, 2H), 6.98 (m, 2H), 5.95 (dd, *J* = 17.9, 10.4 Hz, 1H), 5.17 (d, *J* = 10.8 Hz, 1H), 5.16 (d, *J* = 16.4 Hz, 1H), 3.83 (s, 3H), 3.34 (s, 3H), 2.90 (d, *J* = 18.9 Hz, 2H), 1.23 and 1.21 (s, each 3H); <sup>13</sup>C NMR (50 MHz, CDCl<sub>3</sub>) δ 175.4, 173.6, 159.6, 141.9, 127.5, 124.1, 115.0, 114.5, 84.9, 55.5, 52.5, 44.4, 34.3, 21.6, 21.0; IR (KBr, cm<sup>-1</sup>) ν 1712; MS (EI), *m/z* 303 (M<sup>+</sup>, 21), 235 (100). Anal. Calcd. for C<sub>17</sub>H<sub>21</sub>NO<sub>4</sub>: C, 67.31; H, 6.98; N, 4.62. Found: C, 67.43; H, 6.93; N, 4.58.

**Maleimide 5.** Colorless solid; mp = 70–72 °C (hexanes/ethyl acetate); <sup>1</sup>H NMR (200 MHz, CDCl<sub>3</sub>) δ 7.24 (m, 2H), 6.97 (m, 2H), 6.39 (s, 1H), 6.14 (dd, *J* = 17.6, 10.3 Hz, 1H), 5.15 (d, *J* = 11.0 Hz, 1H), 5.15 (d, *J* = 17.1 Hz, 1H), 3.83 (s, 3H), 1.47 (s, 6H); <sup>13</sup>C NMR (50 MHz, CDCl<sub>3</sub>) δ 169.3, 159.0, 155.5, 143.2, 127.5, 125.7, 124.1, 114.3, 113.6, 55.5, 38.7, 25.8; IR (CHCl<sub>3</sub>, cm<sup>-1</sup>) ν 1703; MS (EI), *m/z* 271 (M<sup>+</sup>, 100). Anal. Calcd. for C<sub>16</sub>H<sub>17</sub>NO<sub>3</sub>: C, 70.83; H, 6.32; N, 5.16. Found: C, 70.92; H, 6.29; N, 5.12.

**Succinimide (+)-4g.** From 50 mg (0.183 mmol) of aldehyde (+)-**1g**, and after chromatography of the residue using hexanes/ethyl acetate (3:1) as eluent, 41 mg (82%) of compound (+)-**4g** were obtained as a colorless solid; ; mp = 145–147 °C (hexanes/ethyl acetate);  $[\alpha]_D = +1.9$  (*c* 0.8, CHCl<sub>3</sub>); <sup>1</sup>H NMR (200 MHz, CDCl<sub>3</sub>) δ 7.22 (m, 2H), 6.98 (m, 2H), 5.88 (m, 2H), 4.49 and 4.28 (m, each 1H), 3.82 (s, 3H), 3.04 and 2.78 (d, *J* = 17.8 Hz, each 1H), 2.76 and 2.21 (m, each 1H); <sup>13</sup>C NMR (50 MHz, CDCl<sub>3</sub>) δ 175.6, 173.2, 159.6, 127.5, 125.5, 124.0, 120.8,

114.4, 74.0, 62.9, 55.4, 41.0, 31.0; IR (KBr,  $\text{cm}^{-1}$ )  $\nu$  1711; MS (EI),  $m/z$  273 ( $\text{M}^+$ , 54), 149 (100).  
Anal. Calcd. for  $\text{C}_{15}\text{H}_{15}\text{NO}_4$ : C, 65.92; H, 5.53; N, 5.13. Found: C, 66.04; H, 5.49; N, 5.10.

**Succinimide (-)-4a.** From 50 mg (0.213 mmol) of aldehyde (+)-*epim-1a*, and after chromatography of the residue using hexanes/ethyl acetate (3:1) as eluent, 40 mg (80%) of compound (-)-**4a** were obtained as a colorless solid; mp = 73–75 °C (hexanes/ethyl acetate);  $[\alpha]_{\text{D}} = -49.6$  ( $c$  0.7,  $\text{CHCl}_3$ );  $^1\text{H}$  NMR (200 MHz,  $\text{CDCl}_3$ )  $\delta$  7.21 (m, 2H), 6.99 (m, 2H), 4.36 (dd,  $J = 8.2$ , 4.2 Hz, 1H), 3.83 (s, 3H), 3.68 (s, 3H), 3.18 (dd,  $J = 18.2$ , 8.2 Hz, 1H), 2.80 (dd,  $J = 18.3$ , 4.2 Hz, 1H);  $^{13}\text{C}$  NMR (50 MHz,  $\text{CDCl}_3$ )  $\delta$  174.7, 173.4, 159.6, 127.6, 123.9, 114.5, 74.7, 59.0, 55.5, 36.1; IR (KBr,  $\text{cm}^{-1}$ )  $\nu$  1719; MS (EI),  $m/z$  235 ( $\text{M}^+$ , 45), 149 (100). Anal. Calcd. for  $\text{C}_{12}\text{H}_{13}\text{NO}_4$ : C, 61.27; H, 5.57; N, 5.95. Found: C, 61.40; H, 5.61; N, 6.04.
